# Supplementary material for: Transport properties of MoS2/V7(Bz)8 and graphene/V7(Bz)8 vdW junctions tuned by bias and gate voltages
Source: Royal Society of Chemistry journal article supplement (doi:10.1039/d2ra02196j), 2022-01-01
Supplement: d2ra02196j1.pdf [file d2ra02196j1.pdf]

## Transport properties of $\text{MoS}_2/\text{V}_7(\text{Bz})_8$ and graphene/ $\text{V}_7(\text{Bz})_8$ vdW junctions tuned by bias and gate voltages

Hong Yu,<sup>1</sup> Danting Li,<sup>1</sup> Yan Shang,<sup>1</sup> Lei Pei,<sup>1</sup> Guiling Zhang,<sup>1,\*</sup> Hong Yan,<sup>1,\*</sup> Long Wang<sup>2</sup>

<sup>1</sup>*School of Materials Science and Chemical Engineering, Harbin University of Science and Technology, Harbin 150040, P. R. China*

<sup>2</sup>*HeiLongJiang Construction Investment Group Co. Ltd., No.523, Sanda Dongli Road , Harbin, 150040, P. R. China*

\*Corresponding author (email: [guiling-002@163.com](mailto:guiling-002@163.com); [yanhong204821@aliyun.com](mailto:yanhong204821@aliyun.com))

Table S1 lists the cartesian coordinates of  $\text{MoS}_2/\text{V}_7(\text{Bz})_8$  vdW junction.

Table S2 lists the cartesian coordinates of graphene/ $\text{V}_7(\text{Bz})_8$  vdW junction.

Figure S1 corresponds to Figure 3. It gives the conductance for Channel S-D, Channel S-G, Channel D-G, and Channel G-G as a function of  $V_G$  at fixed values of  $V_S=0.0$ , 0.2, or 0.4 V of the four-terminal  $\text{MoS}_2/\text{V}_7(\text{Bz})_8$  and graphene/ $\text{V}_7(\text{Bz})_8$  devices. (a) and (b) are for the  $\text{MoS}_2/\text{V}_7(\text{Bz})_8$  and graphene/ $\text{V}_7(\text{Bz})_8$  devices, respectively. Here, the vertical-axis scales are adapted to their content.

Additional result:

Table S1 Cartesian coordinates of the MoS<sub>2</sub>/V<sub>7</sub>(Bz)<sub>8</sub> vdW junction

| Atom | X        | Y        | Z        |
|------|----------|----------|----------|
| Au   | 50.57634 | 14.69631 | 21.84536 |
| Au   | 50.57634 | 18.77457 | 21.84536 |
| Au   | 50.57634 | 16.73544 | 19.80627 |
| Au   | 50.57634 | 16.73544 | 23.8845  |
| Au   | 5.097738 | 14.69631 | 21.84536 |
| Au   | 5.097738 | 18.77457 | 21.84536 |
| Au   | 5.097738 | 16.73544 | 19.80627 |
| Au   | 5.097738 | 16.73544 | 23.8845  |
| Au   | 48.53714 | 16.73544 | 21.84536 |
| Au   | 48.53714 | 14.69631 | 19.80627 |
| Au   | 48.53714 | 14.69631 | 23.8845  |
| Au   | 48.53714 | 18.77457 | 19.80627 |
| Au   | 48.53714 | 18.77457 | 23.8845  |
| Au   | 7.136862 | 16.73544 | 21.84536 |
| Au   | 7.136862 | 14.69631 | 19.80627 |
| Au   | 7.136862 | 14.69631 | 23.8845  |
| Au   | 7.136862 | 18.77457 | 19.80627 |
| Au   | 7.136862 | 18.77457 | 23.8845  |
| H    | 16.73279 | 15.36912 | 24.19692 |
| H    | 23.08426 | 15.36912 | 24.19692 |
| H    | 29.43578 | 15.36912 | 24.19692 |
| H    | 35.78725 | 15.36912 | 24.19692 |
| C    | 16.71586 | 15.98751 | 23.17738 |
| C    | 23.06907 | 15.98751 | 23.17738 |
| C    | 29.42059 | 15.98751 | 23.17738 |
| C    | 35.77206 | 15.98751 | 23.17738 |
| C    | 16.71586 | 17.52672 | 23.17344 |
| C    | 23.06153 | 17.52672 | 23.17344 |
| C    | 29.413   | 17.52672 | 23.17344 |
| C    | 35.76451 | 17.52672 | 23.17344 |
| H    | 16.71412 | 18.14322 | 24.1862  |
| H    | 23.06559 | 18.14322 | 24.1862  |
| H    | 29.41711 | 18.14322 | 24.1862  |
| H    | 35.76858 | 18.14322 | 24.1862  |
| C    | 16.74749 | 18.27246 | 21.83459 |
| C    | 23.09896 | 18.27246 | 21.83459 |
| C    | 29.45048 | 18.27246 | 21.83459 |
| C    | 35.80195 | 18.27246 | 21.83459 |
| H    | 16.72558 | 19.4574  | 21.82427 |
| H    | 23.0771  | 19.4574  | 21.82427 |

|   |          |          |          |
|---|----------|----------|----------|
| H | 29.42862 | 19.4574  | 21.82427 |
| H | 35.78014 | 19.4574  | 21.82427 |
| C | 16.71127 | 17.49921 | 20.51    |
| C | 23.06274 | 17.49921 | 20.51    |
| C | 29.41425 | 17.49921 | 20.51    |
| C | 35.76572 | 17.49921 | 20.51    |
| H | 16.71746 | 18.09828 | 19.48697 |
| H | 23.06893 | 18.09828 | 19.48697 |
| H | 29.42045 | 18.09828 | 19.48697 |
| H | 35.77191 | 18.09828 | 19.48697 |
| C | 16.71949 | 15.95889 | 20.53999 |
| C | 23.07101 | 15.95889 | 20.53999 |
| C | 29.42247 | 15.95889 | 20.53999 |
| C | 35.77399 | 15.95889 | 20.53999 |
| H | 16.73095 | 15.31971 | 19.53238 |
| H | 23.08247 | 15.31971 | 19.53238 |
| H | 29.43399 | 15.31971 | 19.53238 |
| H | 35.78546 | 15.31971 | 19.53238 |
| C | 16.76969 | 15.20298 | 21.86843 |
| C | 23.12116 | 15.20298 | 21.86843 |
| C | 29.47268 | 15.20298 | 21.86843 |
| C | 35.82415 | 15.20298 | 21.86843 |
| V | 18.33068 | 16.73544 | 21.84536 |
| V | 24.68215 | 16.73544 | 21.84536 |
| V | 31.03366 | 16.73544 | 21.84536 |
| V | 37.38514 | 16.73544 | 21.84536 |
| C | 19.9364  | 15.20112 | 21.86485 |
| C | 26.28792 | 15.20112 | 21.86485 |
| C | 32.63944 | 15.20112 | 21.86485 |
| C | 38.99096 | 15.20112 | 21.86485 |
| C | 19.91885 | 18.27831 | 21.83741 |
| C | 26.27032 | 18.27831 | 21.83741 |
| C | 32.62188 | 18.27831 | 21.83741 |
| C | 38.9734  | 18.27831 | 21.83741 |
| C | 19.89317 | 17.52801 | 23.17755 |
| C | 26.24464 | 17.52801 | 23.17755 |
| C | 32.59616 | 17.52801 | 23.17755 |
| C | 38.94767 | 17.52801 | 23.17755 |
| C | 19.89505 | 17.50581 | 20.5083  |
| C | 26.24657 | 17.50581 | 20.5083  |
| C | 32.59804 | 17.50581 | 20.5083  |
| C | 38.94956 | 17.50581 | 20.5083  |
| C | 19.89863 | 15.98493 | 23.17903 |
| C | 26.25015 | 15.98493 | 23.17903 |

|    |          |          |          |
|----|----------|----------|----------|
| C  | 32.60172 | 15.98493 | 23.17903 |
| C  | 38.95319 | 15.98493 | 23.17903 |
| C  | 19.89844 | 15.96108 | 20.53396 |
| C  | 26.24991 | 15.96108 | 20.53396 |
| C  | 32.60143 | 15.96108 | 20.53396 |
| C  | 38.95299 | 15.96108 | 20.53396 |
| H  | 19.89486 | 18.14466 | 24.18973 |
| H  | 26.24633 | 18.14466 | 24.18973 |
| H  | 32.59785 | 18.14466 | 24.18973 |
| H  | 38.94937 | 18.14466 | 24.18973 |
| H  | 19.89796 | 18.10968 | 19.48871 |
| H  | 26.24947 | 18.10968 | 19.48871 |
| H  | 32.60094 | 18.10968 | 19.48871 |
| H  | 38.95246 | 18.10968 | 19.48871 |
| H  | 19.91575 | 15.36627 | 24.19768 |
| H  | 26.26727 | 15.36627 | 24.19768 |
| H  | 32.61874 | 15.36627 | 24.19768 |
| H  | 38.97026 | 15.36627 | 24.19768 |
| H  | 19.91474 | 15.32559 | 19.52487 |
| H  | 26.26621 | 15.32559 | 19.52487 |
| H  | 32.61772 | 15.32559 | 19.52487 |
| H  | 38.96919 | 15.32559 | 19.52487 |
| H  | 19.90705 | 19.46361 | 21.8299  |
| H  | 26.25852 | 19.46361 | 21.8299  |
| H  | 32.61004 | 19.46361 | 21.8299  |
| H  | 38.9615  | 19.46361 | 21.8299  |
| V  | 21.48047 | 16.73469 | 21.84536 |
| V  | 27.83198 | 16.73469 | 21.84536 |
| V  | 34.1835  | 16.73469 | 21.84536 |
| H  | 35.82415 | 14.11296 | 21.86843 |
| H  | 38.99096 | 14.11113 | 21.86485 |
| H  | 19.9364  | 14.11113 | 21.86485 |
| H  | 16.76969 | 14.11296 | 21.86843 |
| Au | 13.25428 | 14.69631 | 21.84536 |
| Au | 13.25428 | 18.77457 | 21.84536 |
| Au | 9.175986 | 14.69631 | 21.84536 |
| Au | 9.175986 | 18.77457 | 21.84536 |
| Au | 15.29338 | 16.73544 | 21.84536 |
| Au | 11.21509 | 16.73544 | 21.84536 |
| Au | 15.29338 | 14.69631 | 19.80627 |
| Au | 15.29338 | 14.69631 | 23.8845  |
| Au | 15.29338 | 18.77457 | 19.80627 |
| Au | 15.29338 | 18.77457 | 23.8845  |
| Au | 11.21509 | 14.69631 | 19.80627 |

|    |          |          |          |
|----|----------|----------|----------|
| Au | 11.21509 | 14.69631 | 23.8845  |
| Au | 11.21509 | 18.77457 | 19.80627 |
| Au | 11.21509 | 18.77457 | 23.8845  |
| Au | 13.25428 | 16.73544 | 19.80627 |
| Au | 13.25428 | 16.73544 | 23.8845  |
| Au | 9.175986 | 16.73544 | 19.80627 |
| Au | 9.175986 | 16.73544 | 23.8845  |
| Au | 42.41984 | 14.69631 | 21.84536 |
| Au | 42.41984 | 18.77457 | 21.84536 |
| Au | 46.49804 | 14.69631 | 21.84536 |
| Au | 46.49804 | 18.77457 | 21.84536 |
| Au | 40.38065 | 16.73544 | 21.84536 |
| Au | 44.45894 | 16.73544 | 21.84536 |
| Au | 40.38065 | 14.69631 | 19.80627 |
| Au | 40.38065 | 14.69631 | 23.8845  |
| Au | 40.38065 | 18.77457 | 19.80627 |
| Au | 40.38065 | 18.77457 | 23.8845  |
| Au | 44.45894 | 14.69631 | 19.80627 |
| Au | 44.45894 | 14.69631 | 23.8845  |
| Au | 44.45894 | 18.77457 | 19.80627 |
| Au | 44.45894 | 18.77457 | 23.8845  |
| Au | 42.41984 | 16.73544 | 19.80627 |
| Au | 42.41984 | 16.73544 | 23.8845  |
| Au | 46.49804 | 16.73544 | 19.80627 |
| Au | 46.49804 | 16.73544 | 23.8845  |
| H  | 23.0771  | 14.11056 | 21.82427 |
| H  | 29.42862 | 14.11185 | 21.82427 |
| H  | 26.25852 | 14.11677 | 21.8299  |
| H  | 32.61004 | 14.11272 | 21.8299  |
| Mo | 27.82004 | 10.28949 | 15.46532 |
| Mo | 27.82004 | 10.28949 | 26.41323 |
| Mo | 27.81854 | 10.24218 | 20.94274 |
| Mo | 27.81854 | 10.24218 | 31.89065 |
| Mo | 24.64302 | 10.28934 | 15.46402 |
| Mo | 24.64302 | 10.28934 | 26.41194 |
| Mo | 30.99454 | 10.28934 | 15.46402 |
| Mo | 30.99454 | 10.28934 | 26.41194 |
| Mo | 24.63122 | 10.24314 | 20.94144 |
| Mo | 24.63122 | 10.24314 | 31.8894  |
| Mo | 30.98269 | 10.24314 | 20.94144 |
| Mo | 30.98269 | 10.24314 | 31.8894  |
| S  | 27.81694 | 8.57439  | 19.09758 |
| S  | 27.81694 | 8.57439  | 30.04545 |
| S  | 27.81786 | 8.60058  | 13.62244 |

|    |          |          |          |
|----|----------|----------|----------|
| S  | 27.81786 | 8.60058  | 24.57035 |
| S  | 24.64331 | 8.5743   | 19.09749 |
| S  | 24.64331 | 8.5743   | 30.04532 |
| S  | 30.99483 | 8.5743   | 19.09749 |
| S  | 30.99483 | 8.5743   | 30.04532 |
| S  | 24.6422  | 8.60025  | 13.62163 |
| S  | 24.6422  | 8.60025  | 24.56955 |
| S  | 30.99372 | 8.60025  | 13.62163 |
| S  | 30.99372 | 8.60025  | 24.56955 |
| S  | 27.81748 | 11.9526  | 19.09923 |
| S  | 27.81748 | 11.9526  | 30.04719 |
| S  | 27.81593 | 11.97789 | 13.62825 |
| S  | 27.81593 | 11.97789 | 24.57621 |
| S  | 24.6422  | 11.95344 | 19.09892 |
| S  | 24.6422  | 11.95344 | 30.04684 |
| S  | 30.99372 | 11.95344 | 19.09892 |
| S  | 30.99372 | 11.95344 | 30.04684 |
| S  | 24.64138 | 11.97822 | 13.62753 |
| S  | 24.64138 | 11.97822 | 24.57545 |
| S  | 30.9929  | 11.97822 | 13.62753 |
| S  | 30.9929  | 11.97822 | 24.57545 |
| Mo | 23.05471 | 10.27134 | 18.179   |
| Mo | 23.05471 | 10.27134 | 29.12682 |
| Mo | 29.40618 | 10.27134 | 18.179   |
| Mo | 29.40618 | 10.27134 | 29.12682 |
| Mo | 23.05297 | 10.28004 | 12.68428 |
| Mo | 23.05297 | 10.28004 | 23.63211 |
| Mo | 29.40448 | 10.28004 | 12.68428 |
| Mo | 29.40448 | 10.28004 | 23.63211 |
| Mo | 26.22994 | 10.27242 | 18.17918 |
| Mo | 26.22994 | 10.27242 | 29.127   |
| Mo | 32.58141 | 10.27242 | 18.17918 |
| Mo | 32.58141 | 10.27242 | 29.127   |
| Mo | 26.22863 | 10.27917 | 12.68848 |
| Mo | 26.22863 | 10.27917 | 23.6364  |
| Mo | 32.58015 | 10.27917 | 12.68848 |
| Mo | 32.58015 | 10.27917 | 23.6364  |
| S  | 23.05771 | 8.58555  | 16.35132 |
| S  | 23.05771 | 8.58555  | 27.29923 |
| S  | 29.40923 | 8.58555  | 16.35132 |
| S  | 29.40923 | 8.58555  | 27.29923 |
| S  | 23.052   | 8.5323   | 10.89432 |
| S  | 23.052   | 8.5323   | 21.84224 |
| S  | 23.052   | 8.5323   | 32.79015 |

|    |          |          |          |
|----|----------|----------|----------|
| S  | 29.40347 | 8.5323   | 10.89432 |
| S  | 29.40347 | 8.5323   | 21.84224 |
| S  | 29.40347 | 8.5323   | 32.79015 |
| S  | 26.23003 | 8.58657  | 16.35136 |
| S  | 26.23003 | 8.58657  | 27.29928 |
| S  | 32.58155 | 8.58657  | 16.35136 |
| S  | 32.58155 | 8.58657  | 27.29928 |
| S  | 26.22341 | 8.54193  | 10.89285 |
| S  | 26.22341 | 8.54193  | 21.84081 |
| S  | 26.22341 | 8.54193  | 32.78863 |
| S  | 32.57497 | 8.54193  | 10.89285 |
| S  | 32.57497 | 8.54193  | 21.84081 |
| S  | 32.57497 | 8.54193  | 32.78863 |
| S  | 23.058   | 11.98674 | 16.36924 |
| S  | 23.058   | 11.98674 | 27.31706 |
| S  | 29.40951 | 11.98674 | 16.36924 |
| S  | 29.40951 | 11.98674 | 27.31706 |
| S  | 23.05273 | 11.99865 | 10.87345 |
| S  | 23.05273 | 11.99865 | 21.82127 |
| S  | 23.05273 | 11.99865 | 32.76919 |
| S  | 29.40429 | 11.99865 | 10.87345 |
| S  | 29.40429 | 11.99865 | 21.82127 |
| S  | 29.40429 | 11.99865 | 32.76919 |
| S  | 26.22994 | 11.98704 | 16.36852 |
| S  | 26.22994 | 11.98704 | 27.31635 |
| S  | 32.58141 | 11.98704 | 16.36852 |
| S  | 32.58141 | 11.98704 | 27.31635 |
| S  | 26.22592 | 11.98689 | 10.87175 |
| S  | 26.22592 | 11.98689 | 21.81966 |
| S  | 26.22592 | 11.98689 | 32.76762 |
| S  | 32.57749 | 11.98689 | 10.87175 |
| S  | 32.57749 | 11.98689 | 21.81966 |
| Au | 32.87748 | 8.25     | 7.136912 |
| Au | 32.87748 | 12.32826 | 7.136912 |
| Au | 24.72098 | 8.25     | 7.136912 |
| Au | 24.72098 | 12.32826 | 7.136912 |
| Au | 28.79918 | 8.25     | 7.136912 |
| Au | 28.79918 | 12.32826 | 7.136912 |
| Au | 22.68188 | 10.28913 | 7.136912 |
| Au | 26.76008 | 10.28913 | 7.136912 |
| Au | 30.83838 | 10.28913 | 7.136912 |
| Au | 22.68188 | 8.25     | 5.097774 |
| Au | 22.68188 | 8.25     | 9.176005 |
| Au | 22.68188 | 12.32826 | 5.097774 |

|    |          |          |          |
|----|----------|----------|----------|
| Au | 22.68188 | 12.32826 | 9.176005 |
| Au | 26.76008 | 8.25     | 5.097774 |
| Au | 26.76008 | 8.25     | 9.176005 |
| Au | 26.76008 | 12.32826 | 5.097774 |
| Au | 26.76008 | 12.32826 | 9.176005 |
| Au | 30.83838 | 8.25     | 5.097774 |
| Au | 30.83838 | 8.25     | 9.176005 |
| Au | 30.83838 | 12.32826 | 5.097774 |
| Au | 30.83838 | 12.32826 | 9.176005 |
| Au | 32.87748 | 10.28913 | 5.097774 |
| Au | 32.87748 | 10.28913 | 9.176005 |
| Au | 24.72098 | 10.28913 | 5.097774 |
| Au | 24.72098 | 10.28913 | 9.176005 |
| Au | 28.79918 | 10.28913 | 5.097774 |
| Au | 28.79918 | 10.28913 | 9.176005 |
| Au | 33.03625 | 8.26407  | 36.71825 |
| Au | 33.03625 | 12.3423  | 36.71825 |
| Au | 24.87976 | 8.26407  | 36.71825 |
| Au | 24.87976 | 12.3423  | 36.71825 |
| Au | 28.958   | 8.26407  | 36.71825 |
| Au | 28.958   | 12.3423  | 36.71825 |
| Au | 22.84066 | 10.30317 | 36.71825 |
| Au | 26.91886 | 10.30317 | 36.71825 |
| Au | 30.99715 | 10.30317 | 36.71825 |
| Au | 22.84066 | 8.26407  | 38.75739 |
| Au | 22.84066 | 8.26407  | 34.7791  |
| Au | 22.84066 | 12.3423  | 38.75739 |
| Au | 22.84066 | 12.3423  | 34.67916 |
| Au | 26.91886 | 8.26407  | 38.75739 |
| Au | 26.91886 | 8.26407  | 34.67916 |
| Au | 26.91886 | 12.3423  | 38.75739 |
| Au | 26.91886 | 12.3423  | 34.67916 |
| Au | 30.99715 | 8.26407  | 38.75739 |
| Au | 30.99715 | 8.26407  | 34.67916 |
| Au | 30.99715 | 12.3423  | 38.75739 |
| Au | 30.99715 | 12.3423  | 34.67916 |
| Au | 33.03625 | 10.30317 | 38.75739 |
| Au | 33.03625 | 10.30317 | 34.67916 |
| Au | 24.87976 | 10.30317 | 38.75739 |
| Au | 24.87976 | 10.30317 | 34.67916 |
| Au | 28.958   | 10.30317 | 38.75739 |
| Au | 28.958   | 10.30317 | 34.67916 |
| S  | 32.57749 | 11.98689 | 32.76762 |
| H  | 21.83211 | 11.3004  | 21.08965 |



|    |          |          |          |
|----|----------|----------|----------|
| H  | 21.83211 | 11.3004  | 15.58188 |
| H  | 21.83211 | 11.3004  | 26.59738 |
| H  | 21.85982 | 9.19803  | 21.07808 |
| H  | 21.85982 | 9.19803  | 15.57035 |
| H  | 21.85982 | 9.19803  | 26.58585 |
| H  | 33.60785 | 11.41179 | 21.0817  |
| H  | 33.60785 | 11.41179 | 15.57393 |
| H  | 33.60785 | 11.41179 | 26.58942 |
| H  | 33.62884 | 9.30279  | 21.08201 |
| H  | 33.62884 | 9.30279  | 15.57424 |
| H  | 33.62884 | 9.30279  | 26.58973 |
| H  | 33.40676 | 9.36492  | 13.49407 |
| H  | 33.40676 | 9.36492  | 24.50957 |
| H  | 33.40676 | 9.36492  | 19.00184 |
| H  | 33.40676 | 9.36492  | 30.01734 |
| H  | 22.05767 | 11.23608 | 13.49854 |
| H  | 22.05767 | 11.23608 | 24.51404 |
| H  | 22.05767 | 11.23608 | 19.00627 |
| H  | 22.05767 | 11.23608 | 30.02176 |
| H  | 22.07537 | 9.26736  | 13.4955  |
| H  | 22.07537 | 9.26736  | 24.511   |
| H  | 22.07537 | 9.26736  | 19.00327 |
| H  | 22.07537 | 9.26736  | 30.01877 |
| H  | 33.39292 | 11.33295 | 13.49823 |
| H  | 33.39292 | 11.33295 | 24.51372 |
| H  | 33.39292 | 11.33295 | 19.00595 |
| H  | 33.39292 | 11.33295 | 30.02145 |
| Au | 32.87748 | 8.25     | 3.058662 |
| Au | 32.87748 | 12.32826 | 3.058662 |
| Au | 24.72098 | 8.25     | 3.058662 |
| Au | 24.72098 | 12.32826 | 3.058662 |
| Au | 28.79918 | 8.25     | 3.058662 |
| Au | 28.79918 | 12.32826 | 3.058662 |
| Au | 22.68188 | 10.28913 | 3.058662 |
| Au | 26.76008 | 10.28913 | 3.058662 |
| Au | 30.83838 | 10.28913 | 3.058662 |
| Au | 22.68188 | 8.25     | 1.019538 |
| Au | 22.68188 | 12.32826 | 1.019538 |
| Au | 26.76008 | 8.25     | 1.019538 |
| Au | 26.76008 | 12.32826 | 1.019538 |
| Au | 30.83838 | 8.25     | 1.019538 |
| Au | 30.83838 | 12.32826 | 1.019538 |
| Au | 32.87748 | 10.28913 | 1.019538 |
| Au | 24.72098 | 10.28913 | 1.019538 |

|    |          |          |          |
|----|----------|----------|----------|
| Au | 28.79918 | 10.28913 | 1.019538 |
| Au | 33.03625 | 8.26407  | 40.79648 |
| Au | 33.03625 | 12.3423  | 40.79648 |
| Au | 24.87976 | 8.26407  | 40.79648 |
| Au | 24.87976 | 12.3423  | 40.79648 |
| Au | 28.958   | 8.26407  | 40.79648 |
| Au | 28.958   | 12.3423  | 40.79648 |
| Au | 22.84066 | 10.30317 | 40.79648 |
| Au | 26.91886 | 10.30317 | 40.79648 |
| Au | 30.99715 | 10.30317 | 40.79648 |
| Au | 22.84066 | 8.26407  | 42.83557 |
| Au | 22.84066 | 12.3423  | 42.83557 |
| Au | 26.91886 | 8.26407  | 42.83557 |
| Au | 26.91886 | 12.3423  | 42.83557 |
| Au | 30.99715 | 8.26407  | 42.83557 |
| Au | 30.99715 | 12.3423  | 42.83557 |
| Au | 33.03625 | 10.30317 | 42.83557 |
| Au | 24.87976 | 10.30317 | 42.83557 |
| Au | 28.958   | 10.30317 | 42.83557 |
| Au | 3.058662 | 16.73544 | 21.84536 |
| Au | 3.058662 | 14.69631 | 19.80627 |
| Au | 3.058662 | 14.69631 | 23.8845  |
| Au | 3.058662 | 18.77457 | 19.80627 |
| Au | 3.058662 | 18.77457 | 23.8845  |
| Au | 1.019538 | 14.69631 | 21.84536 |
| Au | 1.019538 | 18.77457 | 21.84536 |
| Au | 1.019538 | 16.73544 | 19.80627 |
| Au | 1.019538 | 16.73544 | 23.8845  |
| Au | 52.61544 | 16.73544 | 21.84536 |
| Au | 52.61544 | 14.69631 | 19.80627 |
| Au | 52.61544 | 14.69631 | 23.8845  |
| Au | 52.61544 | 18.77457 | 19.80627 |
| Au | 52.61544 | 18.77457 | 23.8845  |
| Au | 54.65464 | 14.69631 | 21.84536 |
| Au | 54.65464 | 18.77457 | 21.84536 |
| Au | 54.65464 | 16.73544 | 19.80627 |
| Au | 54.65464 | 16.73544 | 23.8845  |

---

Table S2 Cartesian coordinates of the graphene/ $V_7(\text{Bz})_8$  vdW junction

| Atom | X        | Y        | Z        |
|------|----------|----------|----------|
| Au   | 49.57631 | 7.631314 | 25.58059 |
| Au   | 49.57631 | 11.70957 | 25.58059 |
| Au   | 49.57631 | 9.670443 | 23.54152 |
| Au   | 49.57631 | 9.670443 | 27.61975 |
| Au   | 47.53712 | 9.670443 | 25.58059 |
| Au   | 47.53712 | 7.631314 | 23.54152 |
| Au   | 47.53712 | 7.631314 | 27.61975 |
| Au   | 47.53712 | 11.70957 | 23.54152 |
| Au   | 47.53712 | 11.70957 | 27.61975 |
| Au   | 5.097728 | 7.631314 | 25.58059 |
| Au   | 5.097728 | 11.70957 | 25.58059 |
| Au   | 5.097728 | 9.670443 | 23.54152 |
| Au   | 5.097728 | 9.670443 | 27.61975 |
| Au   | 7.136851 | 9.670443 | 25.58059 |
| Au   | 7.136851 | 7.631314 | 23.54152 |
| Au   | 7.136851 | 7.631314 | 27.61975 |
| Au   | 7.136851 | 11.70957 | 23.54152 |
| Au   | 7.136851 | 11.70957 | 27.61975 |
| C    | 21.84931 | 5.099985 | 46.18173 |
| C    | 24.3105  | 5.099985 | 46.18173 |
| C    | 26.77175 | 5.099985 | 46.18173 |
| C    | 29.23294 | 5.099985 | 46.18173 |
| C    | 31.69413 | 5.099985 | 46.18173 |
| H    | 33.86873 | 5.099985 | 46.01624 |
| H    | 20.90534 | 5.099985 | 45.63669 |
| C    | 23.07988 | 5.099985 | 45.4712  |
| C    | 25.54113 | 5.099985 | 45.4712  |
| C    | 28.00231 | 5.099985 | 45.4712  |
| C    | 30.4635  | 5.099985 | 45.4712  |
| C    | 32.92475 | 5.099985 | 45.4712  |
| N    | 23.07988 | 5.099985 | 44.05027 |
| C    | 25.54113 | 5.099985 | 44.05027 |
| N    | 28.00231 | 5.099985 | 44.05027 |
| C    | 30.4635  | 5.099985 | 44.05027 |
| N    | 32.92475 | 5.099985 | 44.05027 |
| H    | 20.90534 | 5.099985 | 43.88473 |
| H    | 33.86873 | 5.099985 | 43.50523 |
| C    | 21.84931 | 5.099985 | 43.33975 |
| C    | 24.3105  | 5.099985 | 43.33975 |
| C    | 26.77175 | 5.099985 | 43.33975 |
| C    | 29.23294 | 5.099985 | 43.33975 |
| C    | 31.69413 | 5.099985 | 43.33975 |

|   |          |          |          |
|---|----------|----------|----------|
| C | 21.84931 | 5.099985 | 4.973394 |
| C | 24.3105  | 5.099985 | 4.973394 |
| C | 26.77169 | 5.099985 | 4.973394 |
| C | 29.23294 | 5.099985 | 4.973394 |
| C | 31.69413 | 5.099985 | 4.973394 |
| H | 33.86873 | 5.099985 | 5.138872 |
| H | 20.90534 | 5.099985 | 5.518381 |
| C | 23.07988 | 5.099985 | 5.683864 |
| C | 25.54113 | 5.099985 | 5.683864 |
| C | 28.00231 | 5.099985 | 5.683864 |
| C | 30.4635  | 5.099985 | 5.683864 |
| C | 32.92475 | 5.099985 | 5.683864 |
| N | 23.07988 | 5.099985 | 7.104855 |
| C | 25.54113 | 5.099985 | 7.104855 |
| N | 28.00231 | 5.099985 | 7.104855 |
| C | 30.4635  | 5.099985 | 7.104855 |
| N | 32.92475 | 5.099985 | 7.104855 |
| H | 20.90534 | 5.099985 | 7.27039  |
| H | 33.86873 | 5.099985 | 7.649892 |
| C | 21.84931 | 5.099985 | 7.815325 |
| C | 24.3105  | 5.099985 | 7.815325 |
| C | 26.77169 | 5.099985 | 7.815325 |
| C | 29.23294 | 5.099985 | 7.815325 |
| C | 31.69413 | 5.099985 | 7.815325 |
| C | 23.07988 | 5.099985 | 28.41952 |
| N | 23.07988 | 5.099985 | 11.36783 |
| C | 23.07988 | 5.099985 | 32.68244 |
| C | 23.07988 | 5.099985 | 15.63075 |
| C | 23.07988 | 5.099985 | 36.94536 |
| C | 23.07988 | 5.099985 | 19.89362 |
| C | 23.07988 | 5.099985 | 41.20823 |
| C | 23.07988 | 5.099985 | 24.15659 |
| C | 25.54113 | 5.099985 | 28.41952 |
| C | 25.54113 | 5.099985 | 11.36783 |
| C | 25.54113 | 5.099985 | 32.68244 |
| C | 25.54113 | 5.099985 | 15.63075 |
| C | 25.54113 | 5.099985 | 36.94536 |
| C | 25.54113 | 5.099985 | 19.89362 |
| C | 25.54113 | 5.099985 | 41.20823 |
| C | 25.54113 | 5.099985 | 24.15659 |
| C | 28.00231 | 5.099985 | 28.41952 |
| N | 28.00231 | 5.099985 | 11.36783 |
| C | 28.00231 | 5.099985 | 32.68244 |
| C | 28.00231 | 5.099985 | 15.63075 |

|   |          |          |          |
|---|----------|----------|----------|
| C | 28.00231 | 5.099985 | 36.94536 |
| C | 28.00231 | 5.099985 | 19.89362 |
| C | 28.00231 | 5.099985 | 41.20823 |
| C | 28.00231 | 5.099985 | 24.15659 |
| C | 30.4635  | 5.099985 | 28.41952 |
| C | 30.4635  | 5.099985 | 11.36783 |
| C | 30.4635  | 5.099985 | 32.68244 |
| C | 30.4635  | 5.099985 | 15.63075 |
| C | 30.4635  | 5.099985 | 36.94536 |
| C | 30.4635  | 5.099985 | 19.89362 |
| C | 30.4635  | 5.099985 | 41.20823 |
| C | 30.4635  | 5.099985 | 24.15659 |
| C | 32.92475 | 5.099985 | 28.41952 |
| N | 32.92475 | 5.099985 | 11.36783 |
| C | 32.92475 | 5.099985 | 32.68244 |
| C | 32.92475 | 5.099985 | 15.63075 |
| C | 32.92475 | 5.099985 | 36.94536 |
| C | 32.92475 | 5.099985 | 19.89362 |
| C | 32.92475 | 5.099985 | 41.20823 |
| C | 32.92475 | 5.099985 | 24.15659 |
| C | 21.84931 | 5.099985 | 29.13004 |
| C | 21.84931 | 5.099985 | 12.0783  |
| C | 21.84931 | 5.099985 | 33.39296 |
| C | 21.84931 | 5.099985 | 16.34122 |
| C | 21.84931 | 5.099985 | 37.65583 |
| C | 21.84931 | 5.099985 | 20.60414 |
| C | 21.84931 | 5.099985 | 41.91875 |
| C | 21.84931 | 5.099985 | 24.86712 |
| C | 24.3105  | 5.099985 | 29.13004 |
| C | 24.3105  | 5.099985 | 12.0783  |
| C | 24.3105  | 5.099985 | 33.39296 |
| C | 24.3105  | 5.099985 | 16.34122 |
| C | 24.3105  | 5.099985 | 37.65583 |
| C | 24.3105  | 5.099985 | 20.60414 |
| C | 24.3105  | 5.099985 | 41.91875 |
| C | 24.3105  | 5.099985 | 24.86712 |
| C | 26.77169 | 5.099985 | 29.13004 |
| C | 26.77169 | 5.099985 | 12.0783  |
| C | 26.77175 | 5.099985 | 33.39296 |
| C | 26.77169 | 5.099985 | 16.34122 |
| C | 26.77175 | 5.099985 | 37.65583 |
| C | 26.77169 | 5.099985 | 20.60414 |
| C | 26.77175 | 5.099985 | 41.91875 |
| C | 26.77169 | 5.099985 | 24.86712 |

|   |          |          |          |
|---|----------|----------|----------|
| C | 29.23294 | 5.099985 | 29.13004 |
| C | 29.23294 | 5.099985 | 12.0783  |
| C | 29.23294 | 5.099985 | 33.39296 |
| C | 29.23294 | 5.099985 | 16.34122 |
| C | 29.23294 | 5.099985 | 37.65583 |
| C | 29.23294 | 5.099985 | 20.60414 |
| C | 29.23294 | 5.099985 | 41.91875 |
| C | 29.23294 | 5.099985 | 24.86712 |
| C | 31.69413 | 5.099985 | 29.13004 |
| C | 31.69413 | 5.099985 | 12.0783  |
| C | 31.69413 | 5.099985 | 33.39296 |
| C | 31.69413 | 5.099985 | 16.34122 |
| C | 31.69413 | 5.099985 | 37.65583 |
| C | 31.69413 | 5.099985 | 20.60414 |
| C | 31.69413 | 5.099985 | 41.91875 |
| C | 31.69413 | 5.099985 | 24.86712 |
| C | 21.84931 | 5.099985 | 26.28805 |
| C | 21.84931 | 5.099985 | 9.236317 |
| C | 21.84931 | 5.099985 | 30.55093 |
| C | 21.84931 | 5.099985 | 13.49924 |
| C | 21.84931 | 5.099985 | 34.8139  |
| C | 21.84931 | 5.099985 | 17.76221 |
| C | 21.84931 | 5.099985 | 39.07682 |
| C | 21.84931 | 5.099985 | 22.02513 |
| C | 24.3105  | 5.099985 | 26.28805 |
| C | 24.3105  | 5.099985 | 9.236317 |
| C | 24.3105  | 5.099985 | 30.55093 |
| C | 24.3105  | 5.099985 | 13.49924 |
| C | 24.3105  | 5.099985 | 34.8139  |
| C | 24.3105  | 5.099985 | 17.76221 |
| C | 24.3105  | 5.099985 | 39.07682 |
| C | 24.3105  | 5.099985 | 22.02513 |
| C | 26.77169 | 5.099985 | 26.28805 |
| C | 26.77169 | 5.099985 | 9.236317 |
| C | 26.77169 | 5.099985 | 30.55093 |
| C | 26.77169 | 5.099985 | 13.49924 |
| C | 26.77175 | 5.099985 | 34.8139  |
| C | 26.77169 | 5.099985 | 17.76221 |
| C | 26.77175 | 5.099985 | 39.07682 |
| C | 26.77169 | 5.099985 | 22.02513 |
| C | 29.23294 | 5.099985 | 26.28805 |
| C | 29.23294 | 5.099985 | 9.236317 |
| C | 29.23294 | 5.099985 | 30.55093 |
| C | 29.23294 | 5.099985 | 13.49924 |

|   |          |          |          |
|---|----------|----------|----------|
| C | 29.23294 | 5.099985 | 34.8139  |
| C | 29.23294 | 5.099985 | 17.76221 |
| C | 29.23294 | 5.099985 | 39.07682 |
| C | 29.23294 | 5.099985 | 22.02513 |
| C | 31.69413 | 5.099985 | 26.28805 |
| C | 31.69413 | 5.099985 | 9.236317 |
| C | 31.69413 | 5.099985 | 30.55093 |
| C | 31.69413 | 5.099985 | 13.49924 |
| C | 31.69413 | 5.099985 | 34.8139  |
| C | 31.69413 | 5.099985 | 17.76221 |
| C | 31.69413 | 5.099985 | 39.07682 |
| C | 31.69413 | 5.099985 | 22.02513 |
| C | 23.07988 | 5.099985 | 26.99853 |
| C | 23.07988 | 5.099985 | 9.946786 |
| C | 23.07988 | 5.099985 | 31.26145 |
| C | 23.07988 | 5.099985 | 14.20976 |
| C | 23.07988 | 5.099985 | 35.52442 |
| C | 23.07988 | 5.099985 | 18.47273 |
| N | 23.07988 | 5.099985 | 39.78734 |
| C | 23.07988 | 5.099985 | 22.7356  |
| C | 25.54113 | 5.099985 | 26.99853 |
| C | 25.54113 | 5.099985 | 9.946786 |
| C | 25.54113 | 5.099985 | 31.26145 |
| C | 25.54113 | 5.099985 | 14.20976 |
| C | 25.54113 | 5.099985 | 35.52442 |
| C | 25.54113 | 5.099985 | 18.47273 |
| C | 25.54113 | 5.099985 | 39.78734 |
| C | 25.54113 | 5.099985 | 22.7356  |
| C | 28.00231 | 5.099985 | 26.99853 |
| C | 28.00231 | 5.099985 | 9.946786 |
| C | 28.00231 | 5.099985 | 31.26145 |
| C | 28.00231 | 5.099985 | 14.20976 |
| C | 28.00231 | 5.099985 | 35.52442 |
| C | 28.00231 | 5.099985 | 18.47273 |
| N | 28.00231 | 5.099985 | 39.78734 |
| C | 28.00231 | 5.099985 | 22.7356  |
| C | 30.4635  | 5.099985 | 26.99853 |
| C | 30.4635  | 5.099985 | 9.946786 |
| C | 30.4635  | 5.099985 | 31.26145 |
| C | 30.4635  | 5.099985 | 14.20976 |
| C | 30.4635  | 5.099985 | 35.52442 |
| C | 30.4635  | 5.099985 | 18.47273 |
| C | 30.4635  | 5.099985 | 39.78734 |
| C | 30.4635  | 5.099985 | 22.7356  |

|   |          |          |          |
|---|----------|----------|----------|
| C | 32.92475 | 5.099985 | 26.99853 |
| C | 32.92475 | 5.099985 | 9.946786 |
| C | 32.92475 | 5.099985 | 31.26145 |
| C | 32.92475 | 5.099985 | 14.20976 |
| C | 32.92475 | 5.099985 | 35.52442 |
| C | 32.92475 | 5.099985 | 18.47273 |
| N | 32.92475 | 5.099985 | 39.78734 |
| C | 32.92475 | 5.099985 | 22.7356  |
| H | 33.86873 | 5.099985 | 28.96455 |
| H | 33.86873 | 5.099985 | 11.91281 |
| H | 33.86873 | 5.099985 | 33.22743 |
| H | 33.86873 | 5.099985 | 16.17574 |
| H | 33.86873 | 5.099985 | 37.49035 |
| H | 33.86873 | 5.099985 | 20.43866 |
| H | 33.86873 | 5.099985 | 41.75327 |
| H | 33.86873 | 5.099985 | 24.70163 |
| H | 20.90534 | 5.099985 | 28.585   |
| H | 20.90534 | 5.099985 | 11.53331 |
| H | 20.90534 | 5.099985 | 32.84792 |
| H | 20.90534 | 5.099985 | 15.79623 |
| H | 20.90534 | 5.099985 | 37.11085 |
| H | 20.90534 | 5.099985 | 20.0591  |
| H | 20.90534 | 5.099985 | 41.37377 |
| H | 20.90534 | 5.099985 | 24.32203 |
| H | 20.90534 | 5.099985 | 26.83304 |
| H | 20.90534 | 5.099985 | 9.781303 |
| H | 20.90534 | 5.099985 | 31.09596 |
| H | 20.90534 | 5.099985 | 14.04433 |
| H | 20.90534 | 5.099985 | 35.35894 |
| H | 20.90534 | 5.099985 | 18.3072  |
| H | 20.90534 | 5.099985 | 39.62186 |
| H | 20.90534 | 5.099985 | 22.57012 |
| H | 33.86873 | 5.099985 | 26.45354 |
| H | 33.86873 | 5.099985 | 9.4018   |
| H | 33.86873 | 5.099985 | 30.71646 |
| H | 33.86873 | 5.099985 | 13.66472 |
| H | 33.86873 | 5.099985 | 34.97933 |
| H | 33.86873 | 5.099985 | 17.92769 |
| H | 33.86873 | 5.099985 | 39.2423  |
| H | 33.86873 | 5.099985 | 22.19062 |
| H | 16.73278 | 8.304135 | 27.93211 |
| H | 22.80422 | 8.304135 | 27.93211 |
| H | 28.88578 | 8.304135 | 27.93211 |
| H | 34.93723 | 8.304135 | 27.93211 |



|   |          |          |          |
|---|----------|----------|----------|
| C | 16.71587 | 8.922519 | 26.91258 |
| C | 22.78907 | 8.922519 | 26.91258 |
| C | 28.87063 | 8.922519 | 26.91258 |
| C | 34.92209 | 8.922519 | 26.91258 |
| C | 16.71587 | 10.46173 | 26.90867 |
| C | 22.78154 | 10.46173 | 26.90867 |
| C | 28.86297 | 10.46173 | 26.90867 |
| C | 34.91449 | 10.46173 | 26.90867 |
| H | 16.71411 | 11.07822 | 27.92144 |
| H | 22.78556 | 11.07822 | 27.92144 |
| H | 28.86711 | 11.07822 | 27.92144 |
| H | 34.91864 | 11.07822 | 27.92144 |
| C | 16.74754 | 11.20747 | 25.56981 |
| C | 22.81892 | 11.20747 | 25.56981 |
| C | 28.90048 | 11.20747 | 25.56981 |
| C | 34.95194 | 11.20747 | 25.56981 |
| H | 16.72561 | 12.3924  | 25.55944 |
| H | 22.79706 | 12.3924  | 25.55944 |
| H | 28.87867 | 12.3924  | 25.55944 |
| H | 34.93014 | 12.3924  | 25.55944 |
| C | 16.71129 | 10.43422 | 24.24528 |
| C | 22.78273 | 10.43422 | 24.24528 |
| C | 28.86429 | 10.43422 | 24.24528 |
| C | 34.91568 | 10.43422 | 24.24528 |
| H | 16.71751 | 11.03329 | 23.22219 |
| H | 22.78895 | 11.03329 | 23.22219 |
| H | 28.87044 | 11.03329 | 23.22219 |
| H | 34.92197 | 11.03329 | 23.22219 |
| C | 16.71952 | 8.893891 | 24.27522 |
| C | 22.79102 | 8.893891 | 24.27522 |
| C | 28.87252 | 8.893891 | 24.27522 |
| C | 34.92398 | 8.893891 | 24.27522 |
| H | 16.73095 | 8.25472  | 23.26758 |
| H | 22.80252 | 8.25472  | 23.26758 |
| H | 28.88402 | 8.25472  | 23.26758 |
| H | 34.93541 | 8.25472  | 23.26758 |
| C | 16.76972 | 8.137986 | 25.60366 |
| C | 22.84117 | 8.137986 | 25.60366 |
| C | 28.92272 | 8.137986 | 25.60366 |
| C | 34.97412 | 8.137986 | 25.60366 |
| V | 18.26067 | 9.670443 | 25.58059 |
| V | 24.33212 | 9.670443 | 25.58059 |
| V | 30.3837  | 9.670443 | 25.58059 |
| V | 36.4351  | 9.670443 | 25.58059 |

|   |          |          |          |
|---|----------|----------|----------|
| C | 19.81641 | 8.136131 | 25.60005 |
| C | 25.88791 | 8.136131 | 25.60005 |
| C | 31.93944 | 8.136131 | 25.60005 |
| C | 37.99096 | 8.136131 | 25.60005 |
| C | 19.79881 | 11.21331 | 25.57266 |
| C | 25.87032 | 11.21331 | 25.57266 |
| C | 31.9219  | 11.21331 | 25.57266 |
| C | 37.97343 | 11.21331 | 25.57266 |
| C | 19.77312 | 10.46301 | 26.91279 |
| C | 25.84462 | 10.46301 | 26.91279 |
| C | 31.8962  | 10.46301 | 26.91279 |
| C | 37.94773 | 10.46301 | 26.91279 |
| C | 19.77506 | 10.44082 | 24.24356 |
| C | 25.84657 | 10.44082 | 24.24356 |
| C | 31.89809 | 10.44082 | 24.24356 |
| C | 37.94961 | 10.44082 | 24.24356 |
| C | 19.77858 | 8.919946 | 26.91426 |
| C | 25.85015 | 8.919946 | 26.91426 |
| C | 31.90174 | 8.919946 | 26.91426 |
| C | 37.95319 | 8.919946 | 26.91426 |
| C | 19.77839 | 8.896096 | 24.26917 |
| C | 25.84996 | 8.896096 | 24.26917 |
| C | 31.90142 | 8.896096 | 24.26917 |
| C | 37.95301 | 8.896096 | 24.26917 |
| H | 19.77481 | 11.07966 | 27.92495 |
| H | 25.84632 | 11.07966 | 27.92495 |
| H | 31.89784 | 11.07966 | 27.92495 |
| H | 37.94943 | 11.07966 | 27.92495 |
| H | 19.77795 | 11.04468 | 23.22392 |
| H | 25.84946 | 11.04468 | 23.22392 |
| H | 31.90092 | 11.04468 | 23.22392 |
| H | 37.95244 | 11.04468 | 23.22392 |
| H | 19.79574 | 8.301283 | 27.93288 |
| H | 25.86724 | 8.301283 | 27.93288 |
| H | 31.91876 | 8.301283 | 27.93288 |
| H | 37.97022 | 8.301283 | 27.93288 |
| H | 19.79473 | 8.260599 | 23.26006 |
| H | 25.86617 | 8.260599 | 23.26006 |
| H | 31.91769 | 8.260599 | 23.26006 |
| H | 37.96916 | 8.260599 | 23.26006 |
| H | 19.787   | 12.39862 | 25.56513 |
| H | 25.85857 | 12.39862 | 25.56513 |
| H | 31.91003 | 12.39862 | 25.56513 |
| H | 37.96155 | 12.39862 | 25.56513 |

|    |          |          |          |
|----|----------|----------|----------|
| V  | 21.31044 | 9.669691 | 25.58059 |
| V  | 27.38194 | 9.669691 | 25.58059 |
| V  | 33.43353 | 9.669691 | 25.58059 |
| H  | 34.97412 | 7.047981 | 25.60366 |
| H  | 37.99096 | 7.046144 | 25.60005 |
| H  | 19.81641 | 7.046144 | 25.60005 |
| H  | 16.76972 | 7.047981 | 25.60366 |
| Au | 13.25422 | 7.631314 | 25.58059 |
| Au | 13.25429 | 11.70957 | 25.58059 |
| Au | 9.175976 | 7.631314 | 25.58059 |
| Au | 9.175976 | 11.70957 | 25.58059 |
| Au | 15.29341 | 9.670443 | 25.58059 |
| Au | 11.21504 | 9.670443 | 25.58059 |
| Au | 15.29335 | 7.631314 | 23.54152 |
| Au | 15.29335 | 7.631314 | 27.61975 |
| Au | 15.29341 | 11.70957 | 23.54152 |
| Au | 15.29341 | 11.70957 | 27.61975 |
| Au | 11.21504 | 7.631314 | 23.54152 |
| Au | 11.2151  | 7.631314 | 27.61975 |
| Au | 11.21504 | 11.70957 | 23.54152 |
| Au | 11.2151  | 11.70957 | 27.61975 |
| Au | 13.25429 | 9.670443 | 23.54152 |
| Au | 13.25429 | 9.670443 | 27.61975 |
| Au | 9.175976 | 9.670443 | 23.54152 |
| Au | 9.175976 | 9.670443 | 27.61975 |
| Au | 41.41981 | 7.631314 | 25.58059 |
| Au | 41.41981 | 11.70957 | 25.58059 |
| Au | 45.49806 | 7.631314 | 25.58059 |
| Au | 45.49806 | 11.70957 | 25.58059 |
| Au | 39.38062 | 9.670443 | 25.58059 |
| Au | 43.45893 | 9.670443 | 25.58059 |
| Au | 39.38062 | 7.631314 | 23.54152 |
| Au | 39.38062 | 7.631314 | 27.61975 |
| Au | 39.38062 | 11.70957 | 23.54152 |
| Au | 39.38062 | 11.70957 | 27.61975 |
| Au | 43.45893 | 7.631314 | 23.54152 |
| Au | 43.45893 | 7.631314 | 27.61975 |
| Au | 43.45893 | 11.70957 | 23.54152 |
| Au | 43.45893 | 11.70957 | 27.61975 |
| Au | 41.41981 | 9.670443 | 23.54152 |
| Au | 41.41981 | 9.670443 | 27.61975 |
| Au | 45.49806 | 9.670443 | 23.54152 |
| Au | 45.49806 | 9.670443 | 27.61975 |
| H  | 22.79706 | 7.045566 | 25.55944 |

|   |          |          |          |
|---|----------|----------|----------|
| H | 28.87867 | 7.046861 | 25.55944 |
| H | 25.85857 | 7.051778 | 25.56513 |
| H | 31.91003 | 7.047736 | 25.56513 |
| C | 21.84931 | 5.099985 | 3.552413 |
| C | 24.3105  | 5.099985 | 3.552413 |
| C | 26.77169 | 5.099985 | 3.552413 |
| C | 29.23294 | 5.099985 | 3.552413 |
| C | 31.69413 | 5.099985 | 3.552413 |
| H | 33.86873 | 5.099985 | 3.386935 |
| C | 21.84931 | 5.099985 | 47.60262 |
| C | 24.3105  | 5.099985 | 47.60262 |
| C | 26.77175 | 5.099985 | 47.60262 |
| C | 29.23294 | 5.099985 | 47.60262 |
| C | 31.69413 | 5.099985 | 47.60262 |
| H | 33.86873 | 5.099985 | 47.7681  |
| H | 20.90534 | 5.099985 | 3.007431 |
| N | 23.07988 | 5.099985 | 2.841953 |
| C | 25.54113 | 5.099985 | 2.841953 |
| N | 28.00231 | 5.099985 | 2.841953 |
| C | 30.4635  | 5.099985 | 2.841953 |
| N | 32.92475 | 5.099985 | 2.841953 |
| C | 23.07988 | 5.099985 | 1.420977 |
| C | 25.54113 | 5.099985 | 1.420977 |
| C | 28.00231 | 5.099985 | 1.420977 |
| C | 30.4635  | 5.099985 | 1.420977 |
| C | 32.92475 | 5.099985 | 1.420977 |
| H | 20.90534 | 5.099985 | 1.255484 |
| H | 33.86873 | 5.099985 | 0.875975 |
| C | 21.84931 | 5.099985 | 0.710487 |
| C | 24.3105  | 5.099985 | 0.710487 |
| C | 26.77169 | 5.099985 | 0.710487 |
| C | 29.23294 | 5.099985 | 0.710487 |
| C | 31.69413 | 5.099985 | 0.710487 |
| H | 20.90534 | 5.099985 | 48.14765 |
| N | 23.07988 | 5.099985 | 48.31314 |
| C | 25.54113 | 5.099985 | 48.31314 |
| N | 28.00231 | 5.099985 | 48.31314 |
| C | 30.4635  | 5.099985 | 48.31314 |
| N | 32.92475 | 5.099985 | 48.31314 |
| C | 23.07988 | 5.099985 | 49.73413 |
| C | 25.54113 | 5.099985 | 49.73413 |
| C | 28.00231 | 5.099985 | 49.73413 |
| C | 30.4635  | 5.099985 | 49.73413 |
| C | 32.92475 | 5.099985 | 49.73413 |

|    |          |          |          |
|----|----------|----------|----------|
| H  | 20.90534 | 5.099985 | 49.89961 |
| H  | 33.86873 | 5.099985 | 50.27911 |
| C  | 21.84931 | 5.099985 | 50.4446  |
| C  | 24.3105  | 5.099985 | 50.4446  |
| C  | 26.77175 | 5.099985 | 50.4446  |
| C  | 29.23294 | 5.099985 | 50.4446  |
| C  | 31.69413 | 5.099985 | 50.4446  |
| Au | 3.058666 | 9.670443 | 25.58059 |
| Au | 3.058666 | 7.631314 | 23.54152 |
| Au | 3.058666 | 7.631314 | 27.61975 |
| Au | 3.058666 | 11.70957 | 23.54152 |
| Au | 3.058666 | 11.70957 | 27.61975 |
| Au | 1.019534 | 7.631314 | 25.58059 |
| Au | 1.019534 | 11.70957 | 25.58059 |
| Au | 1.019534 | 9.670443 | 23.54152 |
| Au | 1.019534 | 9.670443 | 27.61975 |
| Au | 51.61543 | 9.670443 | 25.58059 |
| Au | 51.61543 | 7.631314 | 23.54152 |
| Au | 51.61543 | 7.631314 | 27.61975 |
| Au | 51.61543 | 11.70957 | 23.54152 |
| Au | 51.61543 | 11.70957 | 27.61975 |
| Au | 53.65462 | 7.631314 | 25.58059 |
| Au | 53.65462 | 11.70957 | 25.58059 |
| Au | 53.65462 | 9.670443 | 23.54152 |

---

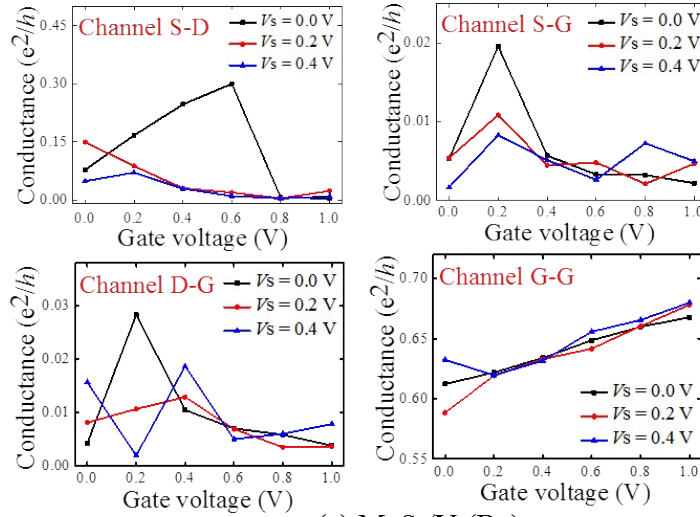

(a)  $\text{MoS}_2/\text{V}_7(\text{Bz})_8$

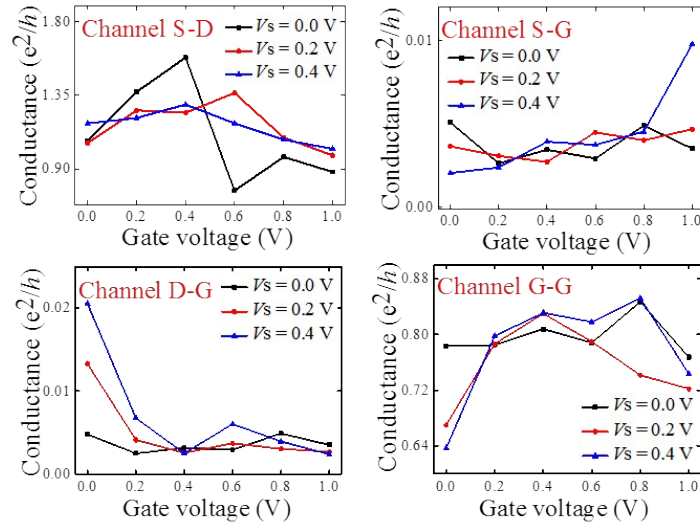

(b)  $\text{graphene}/\text{V}_7(\text{Bz})_8$

Figure S1. Conductance for Channel S-D, Channel S-G, Channel D-G, and Channel G-G as a function of  $V_G$  at fixed values of  $V_S=0.0, 0.2$ , or  $0.4$  V of the four-terminal  $\text{MoS}_2/\text{V}_7(\text{Bz})_8$  and  $\text{graphene}/\text{V}_7(\text{Bz})_8$  devices. (a) and (b) are for the  $\text{MoS}_2/\text{V}_7(\text{Bz})_8$  and  $\text{graphene}/\text{V}_7(\text{Bz})_8$  devices, respectively. This figure corresponds to Figure 3, and here, the vertical-axis scales are adapted to their content.
